# Supplementary material for: Folic acid functionalized aggregation-induced emission nanoparticles for tumor cell targeted imaging and photodynamic therapy
Source: Royal Society of Chemistry journal article supplement (doi:10.1039/d1ra09173e), 2022-01-01
Supplement: d1ra09173e1.pdf [file d1ra09173e1.pdf]

## Supporting Information

### Folic Acid Functionalized Aggregation-induced Emission Nanoparticles for Tumor Cells Targeted Imaging and Photodynamic Therapy †

Danning Wen,<sup>‡a</sup> Xueyun Zhang,<sup>‡a</sup> Lei Ding,<sup>a</sup> Huan Wen,<sup>b</sup> Wen Liu,<sup>a,b\*</sup> Chengwu Zhang,<sup>b</sup> Bin Wang,<sup>b\*</sup> Lihong Li,<sup>a,b</sup> and Haipeng Diao<sup>a,b\*</sup>

---

<sup>a</sup>Department of Biochemistry and Molecular Biology, Shanxi Medical University, Taiyuan 030001, P.R. China. E-mail: liuwen@sxmu.edu.cn, diaohp@sxmu.edu.cn

<sup>b</sup>College of Basic Medical Sciences, Shanxi Medical University, Taiyuan 030001, P.R. China. E-mail: wangbin@sxmu.edu.cn

<sup>‡</sup> The authors contributed equally to this work.

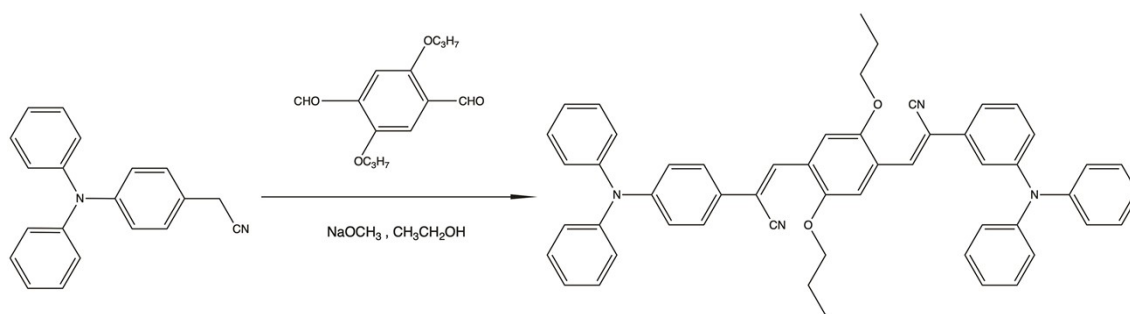

Figure S1 The synthetic route of M1.

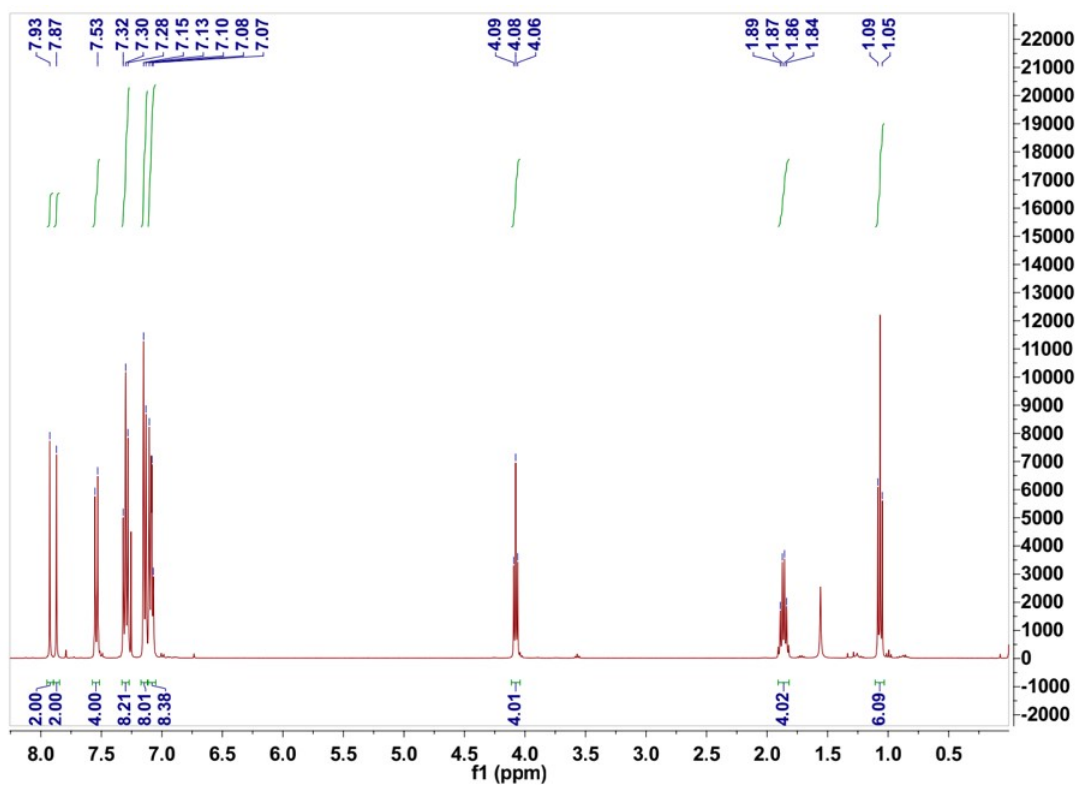

Figure S2 The <sup>1</sup>H NMR spectra of M1 in CDCl<sub>3</sub>.

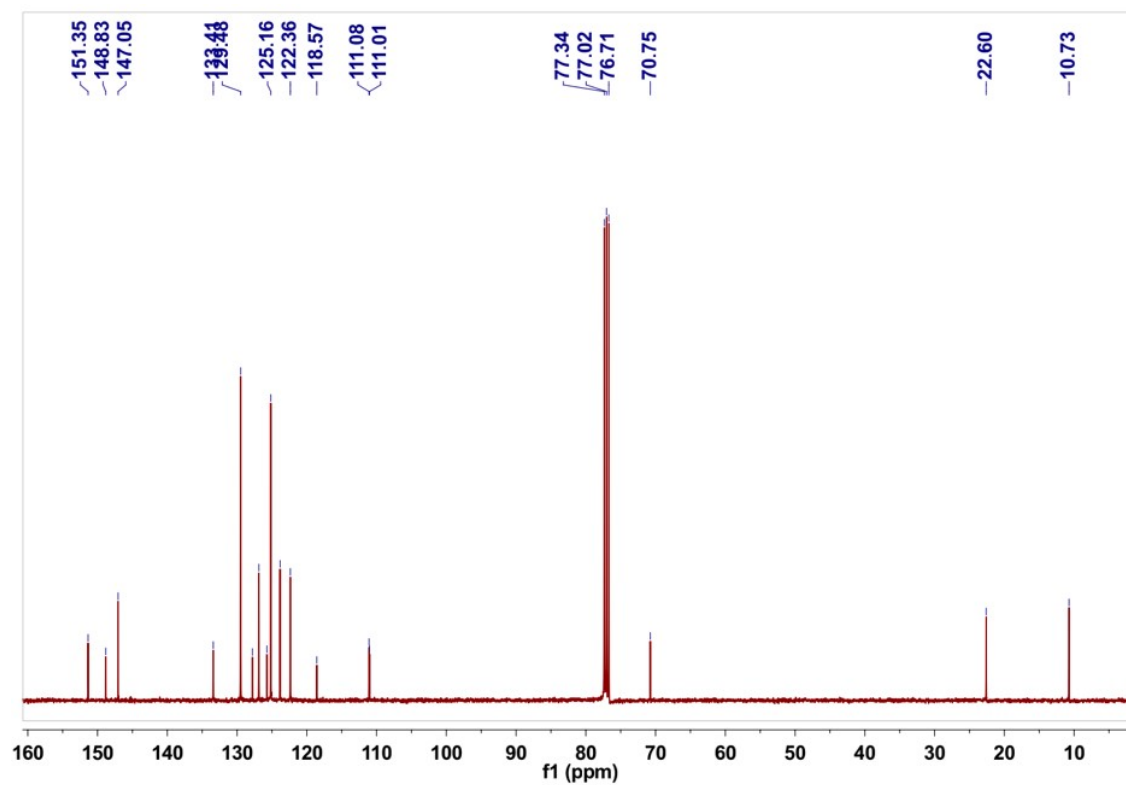

Figure S3 The  $^{13}\text{C}$  NMR spectra of M1 in  $\text{CDCl}_3$ .

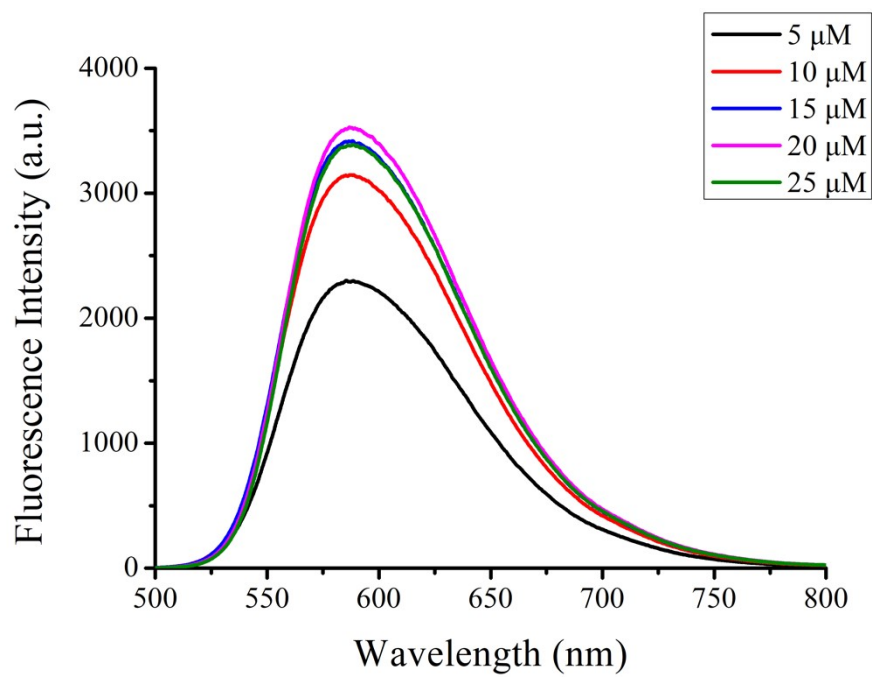

Figure S4. The fluorescence spectra of different concentrations of M1 in THF.

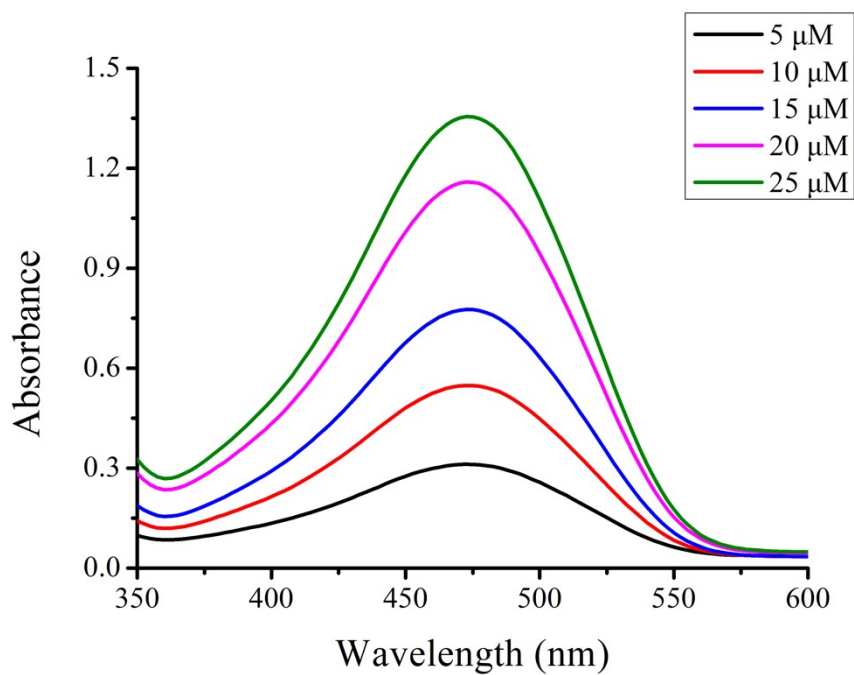

Figure S5. The UV absorption spectra of different concentrations of M1 in THF.

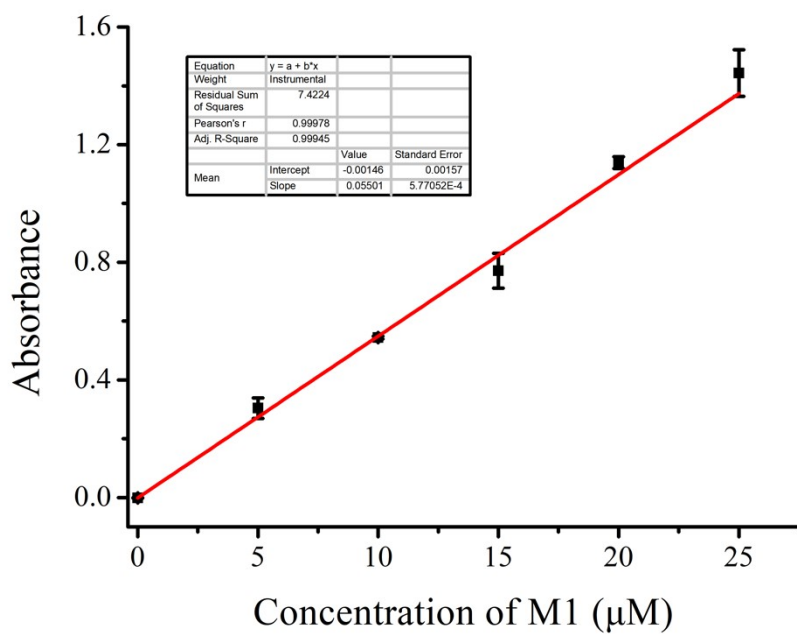

Figure S6 The standard curve of M1.

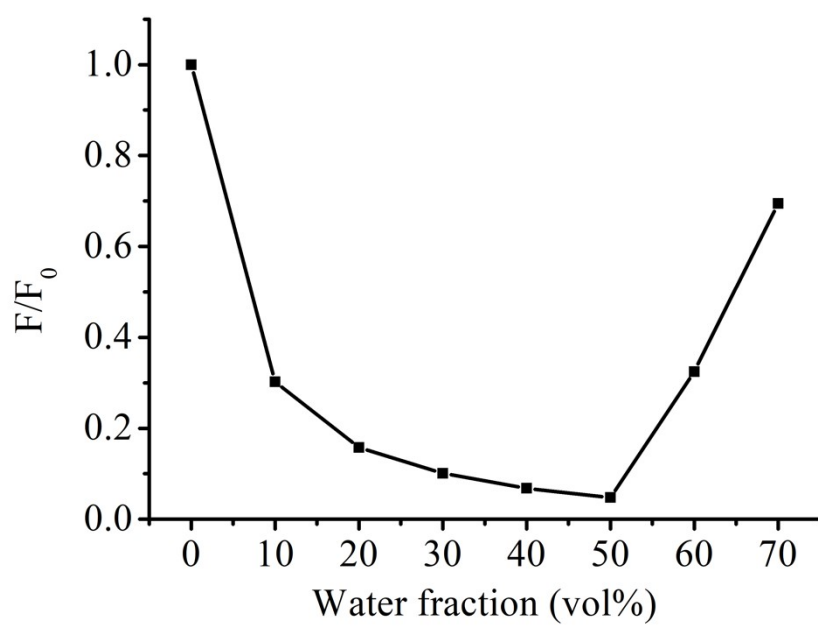

Figure S7. Curves of relative FL intensity ( $F/F_0$ ) of M1 versus H<sub>2</sub>O fraction.

| <b>Fluorescent substance</b> | <b>Absorbance</b> | <b>Integral area</b> | <b>Fitting slope</b> | <b>Relative Fluorescence<br/>Quantum Yield</b> |
|------------------------------|-------------------|----------------------|----------------------|------------------------------------------------|
| Rhodamine 6G                 | 0.0090            | 13050.44             | 1000000              | 0.98                                           |
|                              | 0.0190            | 17437.04             |                      |                                                |
|                              | 0.0289            | 34477.35             |                      |                                                |
|                              | 0.0372            | 41620.18             |                      |                                                |
|                              | 0.0482            | 47939.13             |                      |                                                |
| M1                           | 0.0098            | 7661.91              | 758859               | 0.73                                           |
|                              | 0.0198            | 16845.47             |                      |                                                |
|                              | 0.0298            | 21399.36             |                      |                                                |
|                              | 0.0384            | 31758.20             |                      |                                                |
|                              | 0.0496            | 35571.32             |                      |                                                |
| FFM1                         | 0.0089            | 4285.25              | 426106               | 0.43                                           |
|                              | 0.0181            | 8570.76              |                      |                                                |
|                              | 0.0280            | 14207.85             |                      |                                                |
|                              | 0.0387            | 16162.29             |                      |                                                |
|                              | 0.0490            | 19430.68             |                      |                                                |

Table S1. Fluorescence quantum yields of Rhodamine 6G, M1 and FFM1.

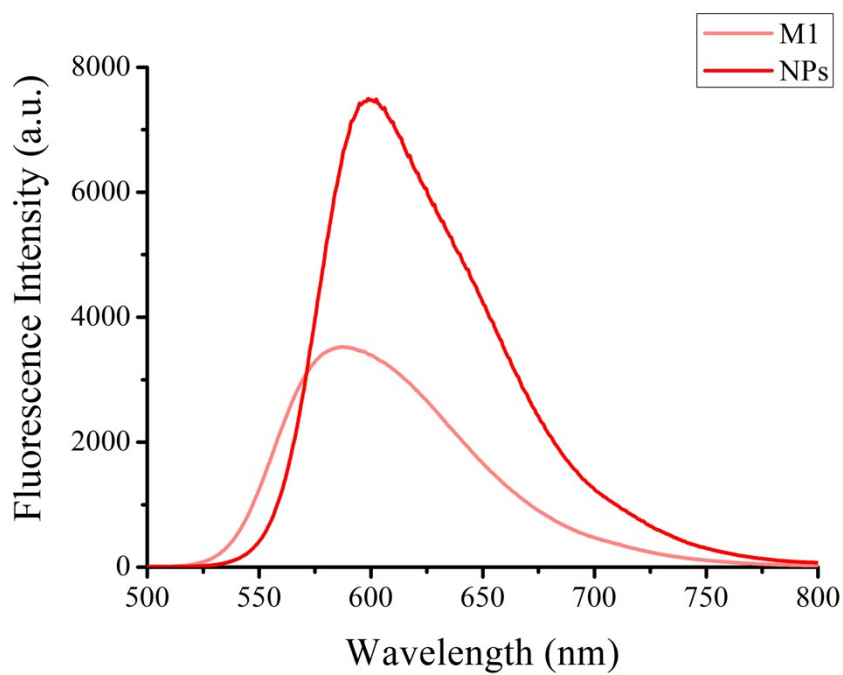

Figure S8 The fluorescence spectra of M1 and FFM1 NPs.

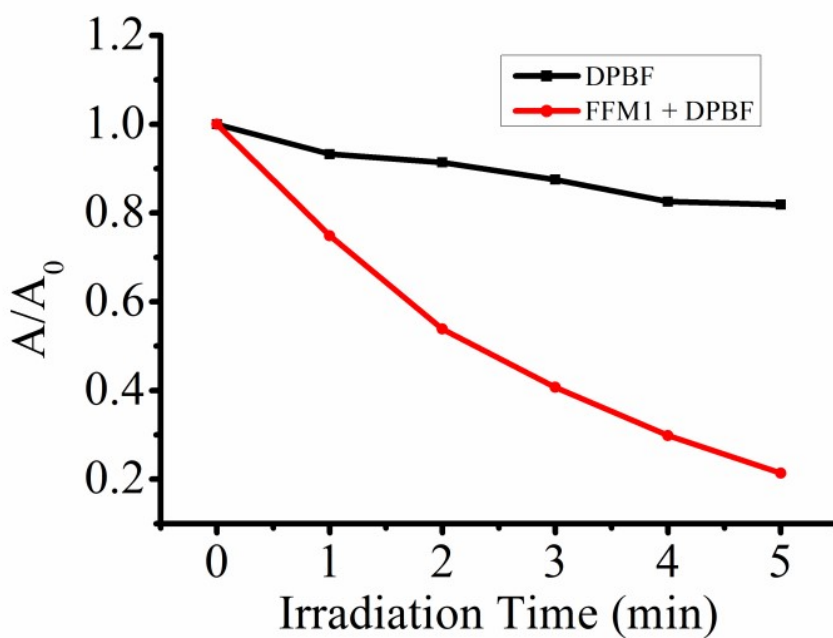

Figure S9. ROS generation type of FFM1 (1.0  $\mu$ M) upon exposure to white light using DPBF (60  $\mu$ M) as an indicator.

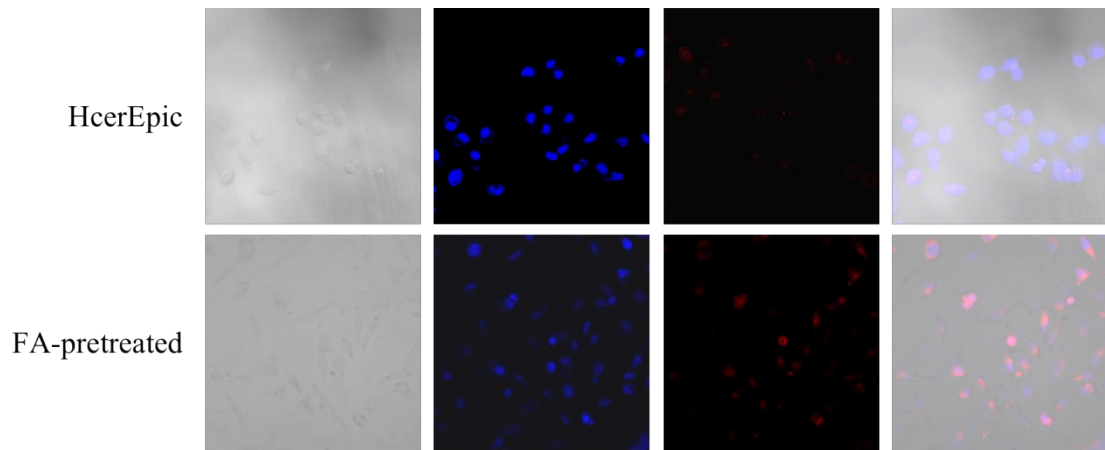

Figure S10. CLSM image of HcerEpic and HeLa cells (FA with/without) were incubated with FFM1 for 6 h.

Scale bar: 50  $\mu\text{m}$ .

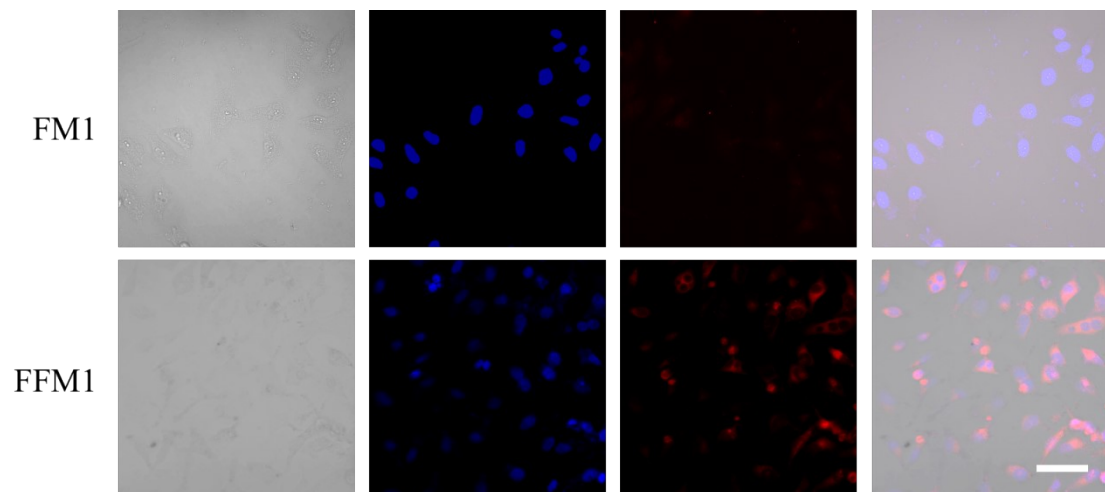

Figure S11. CLSM image of HeLa cells were incubated with FM1 and FFM1 for 6 h. Scale bar: 50  $\mu\text{m}$ .

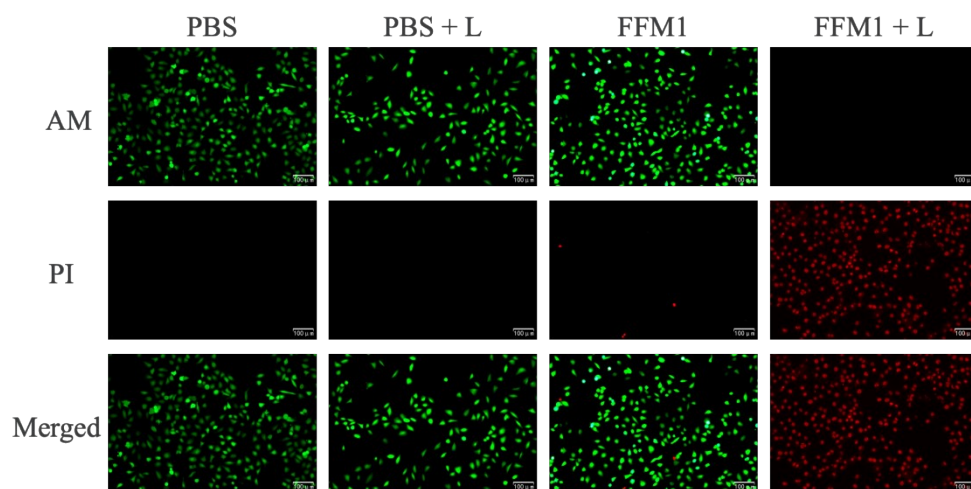

Figure S12. Live/Dead staining assay of HeLa cells after various treatments. Scale bar: 100  $\mu\text{m}$ .
